# Supplementary material for: Biogeography and Environmental Drivers of Legionella pneumophila Abundance and Genotype Composition across the West Bank: Relevance of a Genotype-Based Ecology for Understanding Legionella Occurrence
Source: MDPI journal article supplement (doi:10.3390/pathogens9121012), 2020-12-01
Supplement: s1 [file s1]

## Supplementary Information:

Zayed et al. Environmental Drivers of *L. pneumophila* abundance**Table S1.** Correlation Matrix of physico-chemical and bacteriological parameters in water and biofilm of the eight sampling sites.

| Correlation matrix (n=630) of physicochemical and bacteriological parameters in water and biofilm of the eight sampling sites. Data on <i>Legionella</i> include culture based and PCR based abundance of <i>L. pneumophila</i> and the most abundant genotypes and clonal complexes (VACC). |                         |                                       |         |           |        |        |        |        |          |         |         |        |        |        |           |        |          |        |           |        |        |             |        |        |        |        |        |        |       |       |       |                                      |                         |                                |                                   |       |       |
|----------------------------------------------------------------------------------------------------------------------------------------------------------------------------------------------------------------------------------------------------------------------------------------------|-------------------------|---------------------------------------|---------|-----------|--------|--------|--------|--------|----------|---------|---------|--------|--------|--------|-----------|--------|----------|--------|-----------|--------|--------|-------------|--------|--------|--------|--------|--------|--------|-------|-------|-------|--------------------------------------|-------------------------|--------------------------------|-----------------------------------|-------|-------|
| Sample type                                                                                                                                                                                                                                                                                  | Parameter               | HPC-37C                               | HPC-25C | Leg count | Temp   | pH     | Cond   | Iron   | Chlorine | Nitrate | Ammonia | Zinc   | Turb   | HCO3   | Chlorides | SO4    | Hardness | TDS    | Fluorides | Mg     | Ca     | Ca/Mg Ratio | gH4I7  | gH4I8  | gH4I9  | gH4I10 | gH4I11 | VACC   | VACC  | VACC  | VACC  | Positive swabs Culture Based CDA (%) | Leg spp Primer- CDA (%) | Lpn Primer- Based Positive (%) | * CDA- Culture Based Positive (%) |       |       |
| Water parameter                                                                                                                                                                                                                                                                              | HPC-37C                 | 1.000                                 |         |           |        |        |        |        |          |         |         |        |        |        |           |        |          |        |           |        |        |             |        |        |        |        |        |        |       |       |       |                                      |                         |                                |                                   |       |       |
|                                                                                                                                                                                                                                                                                              | HPC-25C                 | 0.992                                 | 1.000   |           |        |        |        |        |          |         |         |        |        |        |           |        |          |        |           |        |        |             |        |        |        |        |        |        |       |       |       |                                      |                         |                                |                                   |       |       |
|                                                                                                                                                                                                                                                                                              | Legionella count        | 0.132                                 | 0.158   | 1.000     |        |        |        |        |          |         |         |        |        |        |           |        |          |        |           |        |        |             |        |        |        |        |        |        |       |       |       |                                      |                         |                                |                                   |       |       |
|                                                                                                                                                                                                                                                                                              | Temperature             | 0.065                                 | 0.010   | 0.164     | 1.000  |        |        |        |          |         |         |        |        |        |           |        |          |        |           |        |        |             |        |        |        |        |        |        |       |       |       |                                      |                         |                                |                                   |       |       |
|                                                                                                                                                                                                                                                                                              | pH                      | -0.319                                | -0.275  | -0.287    | 0.082  | 1.000  |        |        |          |         |         |        |        |        |           |        |          |        |           |        |        |             |        |        |        |        |        |        |       |       |       |                                      |                         |                                |                                   |       |       |
|                                                                                                                                                                                                                                                                                              | Conductivity            | -0.039                                | -0.073  | -0.097    | -0.143 | -0.312 | 1.000  |        |          |         |         |        |        |        |           |        |          |        |           |        |        |             |        |        |        |        |        |        |       |       |       |                                      |                         |                                |                                   |       |       |
|                                                                                                                                                                                                                                                                                              | Iron                    | 0.191                                 | 0.201   | 0.164     | -0.142 | -0.536 | 0.479  | 1.000  |          |         |         |        |        |        |           |        |          |        |           |        |        |             |        |        |        |        |        |        |       |       |       |                                      |                         |                                |                                   |       |       |
|                                                                                                                                                                                                                                                                                              | Chlorine                | -0.137                                | -0.133  | -0.069    | 0.115  | -0.206 | -0.403 | -0.317 | 1.000    |         |         |        |        |        |           |        |          |        |           |        |        |             |        |        |        |        |        |        |       |       |       |                                      |                         |                                |                                   |       |       |
|                                                                                                                                                                                                                                                                                              | Nitrate                 | 0.293                                 | 0.199   | 0.046     | 0.005  | -0.216 | 0.115  | 0.357  | 0.045    | 1.000   |         |        |        |        |           |        |          |        |           |        |        |             |        |        |        |        |        |        |       |       |       |                                      |                         |                                |                                   |       |       |
|                                                                                                                                                                                                                                                                                              | Ammonia                 | 0.103                                 | 0.143   | -0.151    | -0.123 | -0.041 | 0.207  | -0.546 | -0.247   | 0.169   | 1.000   |        |        |        |           |        |          |        |           |        |        |             |        |        |        |        |        |        |       |       |       |                                      |                         |                                |                                   |       |       |
|                                                                                                                                                                                                                                                                                              | Zinc                    | -0.159                                | -0.158  | -0.188    | -0.123 | 0.092  | 0.017  | -0.048 | 0.315    | 0.341   | 0.132   | 1.000  |        |        |           |        |          |        |           |        |        |             |        |        |        |        |        |        |       |       |       |                                      |                         |                                |                                   |       |       |
|                                                                                                                                                                                                                                                                                              | Turbidity               | 0.012                                 | 0.008   | -0.035    | 0.137  | -0.103 | 0.159  | 0.368  | -0.271   | -0.030  | 0.287   | -0.277 | 1.000  |        |           |        |          |        |           |        |        |             |        |        |        |        |        |        |       |       |       |                                      |                         |                                |                                   |       |       |
|                                                                                                                                                                                                                                                                                              | Bicarbonate             | 0.176                                 | 0.063   | 0.284     | 0.070  | -0.329 | -0.071 | 0.158  | 0.084    | 0.146   | -0.178  | -0.166 | -0.514 | 1.000  |           |        |          |        |           |        |        |             |        |        |        |        |        |        |       |       |       |                                      |                         |                                |                                   |       |       |
|                                                                                                                                                                                                                                                                                              | Chlorides               | -0.397                                | -0.460  | -0.278    | -0.123 | -0.025 | 0.425  | -0.119 | 0.178    | -0.113  | -0.177  | 0.009  | -0.228 | 0.210  | 1.000     |        |          |        |           |        |        |             |        |        |        |        |        |        |       |       |       |                                      |                         |                                |                                   |       |       |
|                                                                                                                                                                                                                                                                                              | Sulfate                 | -0.033                                | -0.097  | -0.236    | -0.085 | 0.057  | 0.081  | -0.346 | 0.307    | 0.090   | -0.197  | 0.366  | -0.290 | 0.251  | 0.440     | 1.000  |          |        |           |        |        |             |        |        |        |        |        |        |       |       |       |                                      |                         |                                |                                   |       |       |
|                                                                                                                                                                                                                                                                                              | Hardness                | -0.320                                | -0.333  | 0.074     | -0.085 | 0.225  | 0.027  | 0.102  | -0.081   | -0.002  | 0.184   | -0.097 | 0.038  | 0.010  | 0.153     | -0.204 | 1.000    |        |           |        |        |             |        |        |        |        |        |        |       |       |       |                                      |                         |                                |                                   |       |       |
|                                                                                                                                                                                                                                                                                              | Total Dissolved Solids  | -0.296                                | -0.287  | -0.131    | -0.267 | 0.089  | 0.247  | -0.159 | 0.178    | -0.041  | 0.002   | 0.284  | -0.608 | 0.125  | 0.571     | -0.758 | 0.305    | 1.000  |           |        |        |             |        |        |        |        |        |        |       |       |       |                                      |                         |                                |                                   |       |       |
|                                                                                                                                                                                                                                                                                              | Fluorides               | -0.109                                | -0.158  | -0.079    | -0.201 | -0.086 | 0.269  | 0.111  | 0.021    | 0.201   | 0.032   | 0.484  | -0.104 | -0.169 | 0.173     | 0.019  | -0.099   | 0.082  | 1.000     |        |        |             |        |        |        |        |        |        |       |       |       |                                      |                         |                                |                                   |       |       |
|                                                                                                                                                                                                                                                                                              | Magnesium               | -0.077                                | -0.022  | -0.508    | -0.115 | 0.130  | 0.269  | 0.083  | -0.175   | -0.064  | 0.287   | 0.091  | 0.526  | -0.614 | 0.195     | -0.220 | 0.331    | 0.041  | 0.159     | 1.000  |        |             |        |        |        |        |        |        |       |       |       |                                      |                         |                                |                                   |       |       |
| Calcium                                                                                                                                                                                                                                                                                      | -0.070                  | -0.169                                | -0.090  | -0.038    | -0.122 | 0.156  | -0.051 | 0.324  | 0.154    | -0.074  | 0.185   | -0.539 | 0.438  | 0.617  | 0.643     | 0.113  | 0.666    | -0.032 | -0.102    | 1.000  |        |             |        |        |        |        |        |        |       |       |       |                                      |                         |                                |                                   |       |       |
| Ca/Mg Ratio                                                                                                                                                                                                                                                                                  | 0.056                   | -0.022                                | 0.499   | 0.110     | -0.176 | -0.212 | -0.048 | 0.262  | 0.135    | -0.236  | -0.010  | -0.598 | 0.668  | -0.028 | 0.346     | -0.255 | 0.125    | -0.150 | -0.349    | 0.380  | 1.000  |             |        |        |        |        |        |        |       |       |       |                                      |                         |                                |                                   |       |       |
| Water + biofilm parameters                                                                                                                                                                                                                                                                   | gH4I7                   | 0.122                                 | 0.120   | 0.205     | -0.185 | -0.192 | 0.112  | 0.161  | 0.144    | -0.029  | -0.058  | 0.070  | 0.165  | -0.035 | 0.041     | -0.312 | 0.187    | -0.124 | 0.302     | 0.215  | -0.068 | -0.164      | 1.000  |        |        |        |        |        |       |       |       |                                      |                         |                                |                                   |       |       |
|                                                                                                                                                                                                                                                                                              | gH4I8                   | -0.044                                | 0.000   | -0.038    | -0.005 | -0.464 | -0.222 | -0.317 | 0.630    | 0.098   | -0.071  | -0.385 | -0.451 | -0.003 | 0.096     | -0.509 | -0.041   | 0.410  | 0.047     | -0.170 | 0.250  | 0.228       | -0.138 | 1.000  |        |        |        |        |       |       |       |                                      |                         |                                |                                   |       |       |
|                                                                                                                                                                                                                                                                                              | gH4I9                   | 0.329                                 | 0.315   | 0.575     | 0.093  | -0.183 | -0.324 | 0.239  | -0.091   | 0.180   | 0.012   | -0.155 | -0.047 | 0.396  | -0.581    | -0.315 | -0.201   | -0.488 | -0.127    | -0.671 | -0.305 | 0.545       | -0.065 | -0.125 | 1.000  |        |        |        |       |       |       |                                      |                         |                                |                                   |       |       |
|                                                                                                                                                                                                                                                                                              | gH4I72                  | 0.129                                 | 0.139   | 0.176     | -0.151 | -0.147 | 0.081  | 0.126  | -0.127   | 0.006   | -0.147  | 0.085  | 0.019  | 0.110  | -0.092    | -0.204 | 0.171    | -0.075 | 0.135     | 0.113  | 0.100  | -0.061      | 0.829  | -0.106 | -0.058 | 1.000  |        |        |       |       |       |                                      |                         |                                |                                   |       |       |
|                                                                                                                                                                                                                                                                                              | gH4I92                  | -0.135                                | -0.115  | -0.085    | -0.118 | 0.109  | -0.080 | -0.077 | -0.087   | -0.086  | 0.229   | 0.159  | 0.146  | -0.302 | -0.028    | -0.201 | 0.185    | -0.034 | 0.346     | 0.292  | -0.264 | -0.334      | 0.359  | -0.099 | -0.124 | 0.072  | 1.000  |        |       |       |       |                                      |                         |                                |                                   |       |       |
|                                                                                                                                                                                                                                                                                              | Water + biofilm gH4I141 | 0.063                                 | 0.086   | 0.252     | 0.228  | -0.229 | -0.094 | 0.123  | -0.042   | 0.035   | -0.026  | -0.159 | 0.012  | 0.180  | -0.307    | -0.230 | -0.123   | -0.264 | -0.046    | -0.527 | -0.261 | 0.474       | 0.009  | -0.065 | -0.525 | -0.068 | -0.064 | 1.000  |       |       |       |                                      |                         |                                |                                   |       |       |
|                                                                                                                                                                                                                                                                                              | gH4I11                  | -0.014                                | -0.021  | 0.340     | -0.135 | -0.200 | -0.056 | 0.111  | -0.066   | 0.031   | -0.115  | -0.067 | -0.160 | 0.285  | 0.094     | -0.035 | 0.467    | 0.337  | 0.027     | 0.005  | 0.375  | 0.119       | 0.513  | -0.058 | -0.073 | 0.604  | 0.007  | -0.038 | 1.000 |       |       |                                      |                         |                                |                                   |       |       |
|                                                                                                                                                                                                                                                                                              | VACC1                   | 0.070                                 | 0.092   | 0.154     | -0.182 | 0.073  | 0.011  | -0.016 | 0.215    | 0.014   | -0.078  | 0.316  | -0.108 | -0.050 | 0.059     | 0.015  | 0.147    | 0.138  | 0.326     | 0.108  | 0.138  | -0.029      | 0.830  | -0.140 | 0.682  | 0.297  | -0.034 | 0.421  | 0.421 | 1.000 |       |                                      |                         |                                |                                   |       |       |
|                                                                                                                                                                                                                                                                                              | VACC2                   | 0.097                                 | 0.157   | 0.315     | -0.154 | -0.161 | 0.011  | 0.106  | -0.162   | -0.040  | -0.254  | -0.043 | -0.021 | 0.228  | -0.238    | -0.255 | 0.095    | -0.186 | 0.030     | -0.132 | -0.154 | 0.076       | 0.575  | -0.148 | 0.162  | 0.825  | -0.009 | 0.143  | 0.431 | 0.426 | 1.000 |                                      |                         |                                |                                   |       |       |
|                                                                                                                                                                                                                                                                                              | VACC3                   | -0.029                                | -0.007  | 0.256     | -0.033 | 0.070  | -0.028 | -0.029 | -0.099   | 0.052   | -0.247  | 0.053  | -0.328 | 0.257  | 0.107     | 0.166  | 0.359    | 0.407  | 0.046     | -0.039 | 0.384  | 0.146       | 0.345  | 0.164  | -0.122 | 0.507  | -0.097 | -0.063 | 0.739 | 0.393 | 0.440 | 1.000                                |                         |                                |                                   |       |       |
|                                                                                                                                                                                                                                                                                              | VACC11                  | 0.196                                 | 0.208   | 0.748     | 0.125  | -0.187 | -0.271 | 0.176  | -0.109   | 0.111   | 0.063   | -0.113 | 0.036  | 0.211  | -0.517    | -0.378 | -0.109   | -0.438 | 0.021     | -0.554 | -0.411 | 0.434       | 0.099  | -0.145 | 0.839  | -0.042 | 0.272  | 0.267  | 0.060 | 0.009 | 0.166 | -0.142                               | 1.000                   |                                |                                   |       |       |
|                                                                                                                                                                                                                                                                                              | Biofilm parameters      | Positive swabs- Culture Based CDA (%) | 0.043   | 0.087     | 0.678  | 0.123  | 0.040  | -0.269 | -0.111   | 0.256   | -0.028  | -0.253 | 0.115  | -0.158 | 0.161     | -0.200 | -0.108   | 0.025  | -0.107    | 0.064  | -0.411 | -0.091      | 0.402  | 0.508  | 0.359  | 0.383  | 0.389  | 0.183  | 0.580 | 0.256 | 0.661 | 0.438                                | 0.277                   | 0.589                          | 1.000                             |       |       |
| Legionella spp Primer- CDA (%)                                                                                                                                                                                                                                                               |                         | 0.247                                 | 0.315   | 0.184     | -0.341 | -0.072 | -0.237 | -0.074 | 0.297    | -0.049  | 0.022   | 0.179  | -0.248 | 0.071  | -0.043    | 0.102  | -0.191   | 0.068  | 0.108     | -0.247 | 0.114  | 0.282       | 0.234  | 0.305  | 0.237  | 0.130  | 0.129  | 0.127  | 0.090 | 0.372 | 0.161 | 0.042                                | 0.265                   | 0.464                          | 1.000                             |       |       |
| L. pneumophila Primer- CDA (%)                                                                                                                                                                                                                                                               |                         | 0.321                                 | 0.355   | 0.275     | -0.183 | -0.090 | -0.216 | -0.046 | 0.305    | -0.043  | -0.070  | 0.136  | -0.270 | 0.154  | -0.091    | 0.189  | -0.205   | 0.110  | 0.022     | -0.305 | 0.130  | 0.343       | 0.267  | 0.374  | 0.188  | 0.188  | 0.163  | 0.198  | 0.159 | 0.439 | 0.195 | 0.130                                | 0.282                   | 0.561                          | 0.346                             | 1.000 |       |
| * CDA Culture Based Positive (%)                                                                                                                                                                                                                                                             |                         | -0.017                                | 0.051   | 0.341     | -0.051 | 0.137  | -0.368 | -0.201 | 0.356    | -0.156  | -0.270  | 0.139  | -0.072 | 0.025  | -0.210    | -0.144 | -0.033   | -0.160 | 0.001     | -0.306 | -0.209 | 0.239       | 0.411  | 0.335  | 0.347  | 0.247  | 0.274  | 0.247  | 0.078 | 0.569 | 0.293 | 0.100                                | 0.448                   | 0.810                          | 0.525                             | 0.557 | 1.000 |

Legend: Color code: Red: correlation rs > 0.70-0.9; Orange: correlation rs > 0.50-0.7; and yellow: correlation rs > 0.30-0.5; (Positive/negative); indicate the positive/negative value of r \*. additional culture based analysis of samples taken for PCR analysis

Legend: Color code: Red: correlation rs 0.7-0.9, Orange: correlation rs 0.5-0.7 and yellow: correlation rs 0.3-0.5. (positive/negative); indicate the positive/negative value of "r", additional culture based analysis of samples taken for PCR analysis

| <b>Table S2.</b> Sampling location and number of isolates obtained from each site from six sampling campaigns in 2012-2014. |                          |                            |                                                  |                                   |                                                 |
|-----------------------------------------------------------------------------------------------------------------------------|--------------------------|----------------------------|--------------------------------------------------|-----------------------------------|-------------------------------------------------|
| <b>Sampling site<br/>(North to<br/>South)</b>                                                                               | <b>Coordina-<br/>tes</b> | <b>No. of<br/>isolates</b> | <b>Percent<br/>of total<br/>isolates<br/>(%)</b> | <b>No. of<br/>geno-<br/>types</b> | <b>Ratio:<br/>geno-<br/>types/<br/>isolates</b> |
| <b>A Jenin</b>                                                                                                              | 32°27' N,<br>35°17' E    | 28                         | 15.6                                             | 5                                 | 0.19                                            |
| <b>B Nablus</b>                                                                                                             | 32°13' N,<br>35°14' E    | 32                         | 17.8                                             | 5                                 | 0.16                                            |
| <b>C Nablus</b>                                                                                                             | 32°13' N,<br>35°15' E    | 5                          | 2.8                                              | 2                                 | 0.4                                             |
| <b>D Ramallah</b>                                                                                                           | 31°53' N,<br>35°12' E    | 18                         | 10.0                                             | 2                                 | 0.11                                            |
| <b>Al-Quds<br/>University/<br/>East Jerusalem</b>                                                                           | 31°45' N,<br>35°15' E    | 15                         | 8.3                                              | 6                                 | 0.4                                             |
| <b>E East<br/>Jerusalem</b>                                                                                                 | 31°46' N,<br>35°14' E    | 10                         | 5.6                                              | 6                                 | 0.6                                             |
| <b>F Bethlehem</b>                                                                                                          | 31°42' N,<br>35°11' E    | 32                         | 17.8                                             | 7                                 | 0.22                                            |
| <b>G Hebron</b>                                                                                                             | 31°33' N,<br>35° 04' E   | 34                         | 18.9                                             | 5                                 | 0.15                                            |
| <b>H Hebron</b>                                                                                                             | 31°31' N,<br>35° 05' E   | 6                          | 3.3                                              | 4                                 | 0.67                                            |
| <b>Total</b>                                                                                                                |                          | <b>180</b>                 | <b>100</b>                                       | <b>27</b>                         |                                                 |

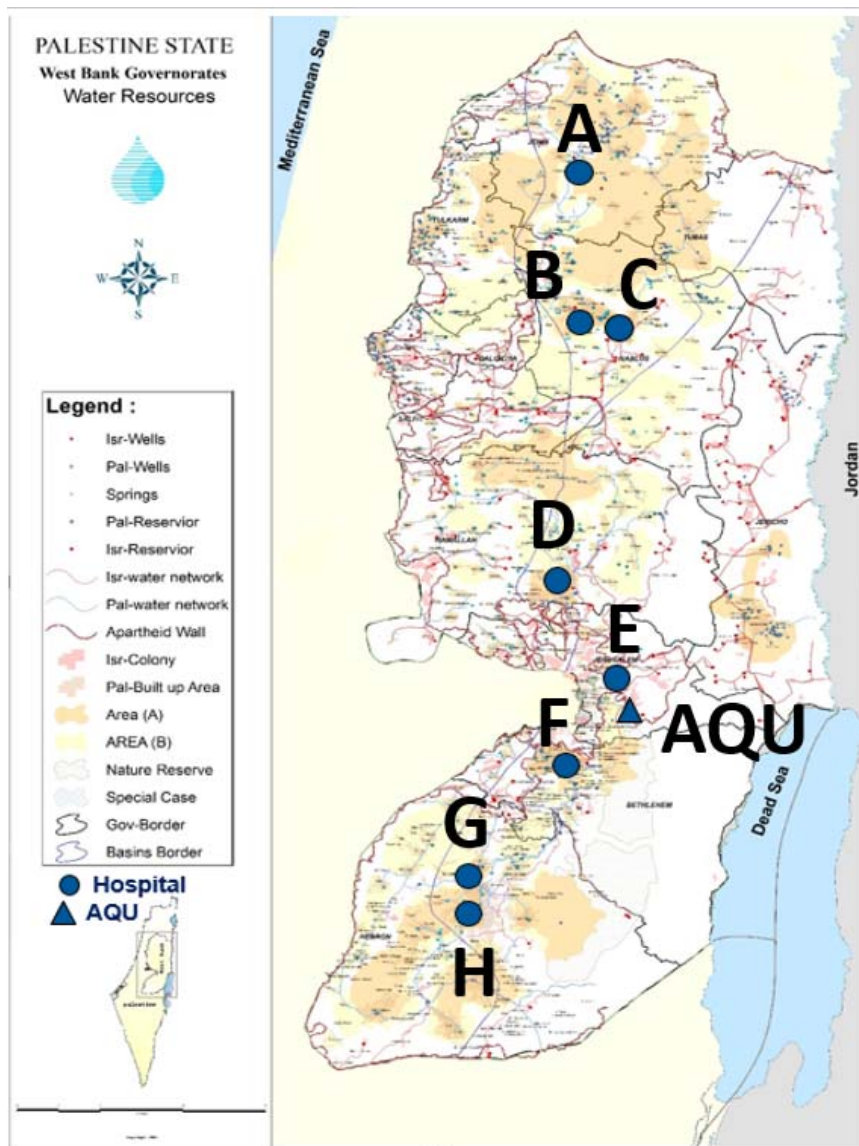

**Figure S1**

Sampling sites of the eight hospitals (A-H) and Al-Quds University (AQU) in the West Bank, Palestine.

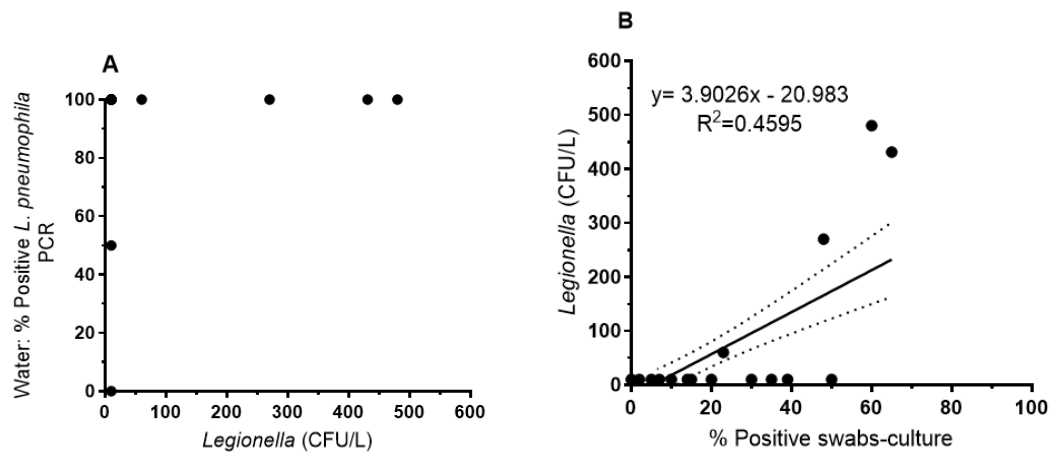

**Figure S2**

*Legionella* plate counts vs. *L. pneumophila* specific PCR-detection in cold water samples (A), and vs. culture-based positive biofilm swabs (B, \*\*\*,  $p < 0.001$ ) (A, B:  $n = 45$ )

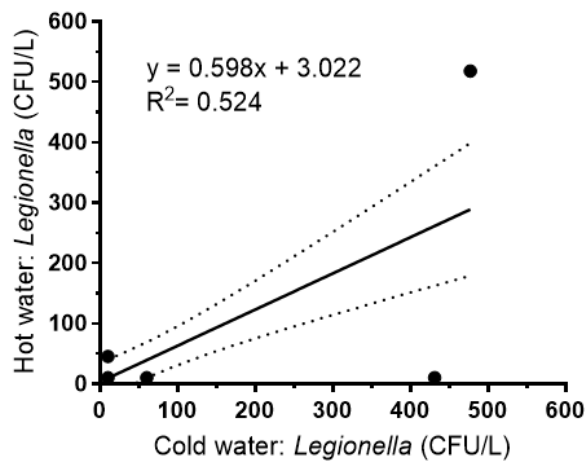

**Figure S3**

Correlation of *Legionella* plate counts of cold versus hot water ( $n=24$ ) (\*\*\*,  $p < 0.001$ ).

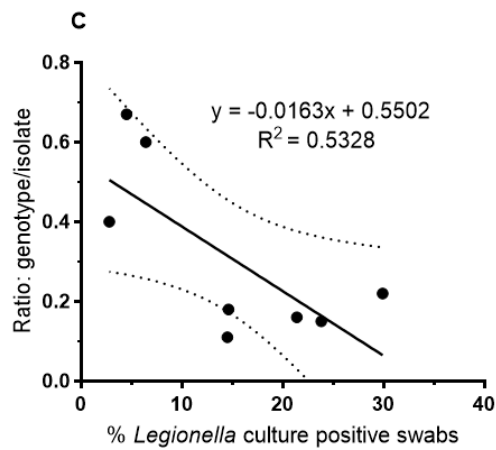

**Figure S4**

MLVA 8(12)-genotype diversity (number of genotypes / number of strains retrieved per sampling site) vs. the average percentage of *Legionella* positive biofilm swabs (by cultivation) per sampling site (n=45, mean values n=8) (\*,  $p < 0.05$ ).
